# Supplementary material for: First shotgun metagenomics study of Juan de Fuca deep-sea sediments reveals distinct microbial communities above, within, between, and below sulfate methane transition zones
Source: Front Microbiol. 2023 Nov 20;14:1241810. doi: 10.3389/fmicb.2023.1241810 (PMC10694467; doi:10.3389/fmicb.2023.1241810)
Supplement: Supplementary file 5 [file Table_5.xlsx]

## Sheet: completeness_contigs
MAG_name	bin	Calvin Cycle	Reductive citrate cycle (Arnon-Buchanan cycle)	Wood-Ljungdahl pathway	Acetogenesis	Acetate oxidation	Toluene degradation	Toluene degradation, anaerobic, toluene => benzoyl-CoA	Phenol degradation	Phtalate degradation	Catechol degradation	Benzoyl-CoA reduction	Formaldehyde oxidation	Fermentation (Pyruvate to Ethanol)	Fermentation (Pyruvate to Acetate)	Fermentation (Pyruvate to Succinate)	Fermentation (Pyruvate to Propanoate)	Fermentation (Pyruvate to Butanoate)	Fermentation (Pyruvate to Butanol)	Fermentation (Pyruvate to Lactate)	Fermentation (Pyruvate to Acetone)	Fermentation (Pyruvate to Formate)	Arsenite oxidation	Arsenate reduction	Selenate reduction	Halogenated Compound Utilization (Tetrachloroethene)	Halogenated Compound Utilization (Vinyl Chloride)	Halogenated Compound Utilization (Dichloromethane)	Halogenated Compound Utilization (Pentachlorophenol)	Halogenated Compound Utilization (1,2,4-Trichlorobenzene)	Halogenated Compound Utilization (Bromoxynil)	Halogenated Compound Utilization (4-Fluorobenzoate)	Aerobic CO-Oxidation	Hydrogen oxidation	Red/Ox Iron	Complex Carbon Degradation(Cellulose)	Complex Carbon Degradation(Chitin)	Complex Carbon Degradation(Galactan)	Complex Carbon Degradation(Manooligo/poly-saccharide)	Complex Carbon Degradation(Xylan)	Complex Carbon Degradation(Keratan)	Complex Carbon Degradation(Galactan)	Fatty acid degradation	Coenzyme M biosynthesis	Methane oxidation, methanotroph, methane => formaldehyde	Methanogenesis, acetate => methane	Methanogenesis, CO2 => methane	methanol => methane	methylamine/dimethylamine/trimethylamine => methane
JdF_1	maxbin_233_sub	NA	NA	NA	NA	NA	NA	NA	K00632	NA	NA	NA	NA	NA	K00161;K00128	NA	K01895;K00656	K00626;K00626	K00626;K00626	NA	K00626;K01641;K00626	K00656	NA	NA	NA	NA	NA	NA	NA	NA	NA	NA	K00197	K00436	NA	NA	NA	NA	K01218	NA	NA	NA	NA	NA	NA	K14128;K14126;K01895;K08264;K14128;K14126	K14128;K14126;K08264;K14128;K14126	K14128;K14126;K08264;K14128;K14126	K14128;K14126;K08264;K14128;K14126
JdF_2	maxbin_215_sub	K00134;K01624;K00134;K00927	K01007;K00169;K00171;K00172;K15234	NA	NA	NA	NA	NA	NA	NA	NA	K07538	NA	NA	K01895;K00627;K00627;K00627	NA	K01895;K01961;K11263;K00169;K00171;K00172	K00626	K00626	NA	K01641;K01027;K01029;K01641;K00626	NA	NA	NA	K12527	NA	NA	NA	NA	NA	NA	NA	K14138;K03518;K03519;K03518;K03519	K00436	NA	K05350	NA	NA	NA	NA	NA	NA	NA	NA	NA	K01895;K14128;K14127;K03388;K03388;K14128;K03388;K03388;K03388;K03388;K03388	K11260;K14128;K14127;K03388;K03388;K14128;K03388;K03388;K03388;K03388;K03388	K14128;K14127;K03388;K03388;K14128;K03388;K03388;K03388;K03388;K03388	K14128;K14127;K03388;K03388;K14128;K03388;K03388;K03388;K03388;K03388
JdF_3	maxbin_171_sub	K00134;K00134	K01678;K01677;K01678;K00244;K00170;K00169;K00171;K00172;K00170	NA	NA	NA	NA	NA	NA	NA	NA	K07538;K07539;K07537	NA	NA	K00016;K01895;K22224;K22224;K22224	K00024;K00024;K00244	K01895;K00170;K00169;K00171;K00172;K00170	K00074;K00074	K00074;K00074	K00016	K01027	K00656	NA	NA	K00384;K00384;K00384;K07309;K07310	NA	NA	NA	NA	NA	NA	NA	K03518;K00197	NA	NA	NA	NA	NA	NA	NA	NA	NA	NA	NA	NA	K14127;K01895;K03389;K03388;K03388	K14127;K03389;K03388;K03388	K14127;K03389;K03388;K03388	K14127;K03389;K03388;K03388
JdF_4	maxbin_218_sub	K00927;K00134;K00927	K00239;K00240	NA	NA	NA	NA	NA	K01821	NA	NA	K19515	NA	NA	K01512;K00627	K00239;K00240	K01715;K17489;K00656	K00626;K01715	K00626;K01715	NA	K00626;K01029;K01035	K00656	NA	NA	K17050	NA	NA	NA	NA	NA	NA	NA	NA	NA	NA	NA	NA	K01190	NA	NA	NA	K01190	K00249;K00249	NA	NA	K03388	K03388	K03388	K14084;K03388
JdF_5	maxbin_80_sub	K00927	K01678;K01677	K05299;K05299	NA	NA	K00055	NA	NA	NA	NA	NA	NA	K00121	K00161	NA	NA	NA	NA	NA	NA	NA	NA	NA	K00955;K00956;K00955;K00957	NA	NA	NA	NA	NA	NA	NA	NA	NA	NA	K05349;K01179	NA	NA	NA	NA	NA	NA	NA	NA	NA	K14127;K00125;K14127;K03388;K03388	K14127;K00125;K14127;K03388;K03388	K14127;K00125;K14127;K03388;K03388	K14127;K00125;K14127;K03388;K03388
JdF_6	maxbin_185_sub	NA	K00239;K01960;K01678;K01677;K01007;K01678;K01678;K00239;K01007;K01007;K01677;K00239;K01677;K01007;K01007	K05299;K05299;K05299	NA	NA	NA	NA	K01856	NA	K01856	K19515	NA	K13953;K13953	K22224;K00161	K00239;K00024;K01571;K00239;K00244;K00239;K00024	K01905;K22224;K01715	K00626;K01715;K00626;K00626;K00626;K00626	K00626;K01715;K00626;K00626;K00626;K00626	NA	K00626;K00626;K00626;K00626;K00626;K01641	NA	NA	NA	K00384;K00384	NA	NA	NA	NA	NA	NA	K01856	K14138;K00197;K14138	NA	NA	NA	NA	NA	NA	NA	NA	NA	NA	NA	NA	K03388;K03388;K00125;K03388	K03388;K03388;K00125;K03388	K03388;K03388;K00125;K03388	K03388;K03388;K00125;K03388
JdF_7	maxbin_167_sub	K01808;K00927	K00170;K00169;K00171;K00244	NA	NA	NA	NA	K07540	NA	NA	NA	NA	NA	K13953	K00128;K00162;K00161	K00244	K01895;K00170;K00169;K00171;K01895;K00248	K00074	K00074	NA	NA	K00656	NA	NA	NA	NA	NA	NA	NA	NA	NA	NA	K03519	K00436;K00436	K03594	NA	NA	NA	NA	NA	NA	NA	K00249;K00249	NA	NA	K01895;K03388;K01895;K14126;K03389	K03388;K14126;K03389	K03388;K14126;K03389	K03388;K14126;K03389
JdF_8	maxbin_175_sub	K00927	K00169;K00171;K00172	NA	NA	NA	NA	NA	NA	NA	NA	NA	NA	NA	K00161	NA	K00169;K00171;K00172	NA	NA	NA	NA	NA	NA	NA	K00384	NA	NA	NA	NA	NA	NA	NA	NA	NA	NA	NA	NA	NA	NA	NA	NA	NA	K00249	NA	NA	K03388;K03388	K03388;K03388	K03388;K03388	K03388;K03388
JdF_9	maxbin_154_sub	K01808;K01808;K01624	K01960;K01960	K00198;K05299;K05299;K05299;K05299	NA	NA	NA	K07544	K00632	NA	NA	K07537	NA	NA	K01895;K01895;K01895;K01895	K01571	K01895;K01895;K00248;K00656;K03416;K01895;K01895;K01715;K01692	K00626;K00626;K00626;K00626;K00074;K00626;K00074;K01692	K00626;K00626;K00626;K00626;K00074;K00626;K00074;K01692	NA	K01641;K00626;K00626;K01029;K00626;K00626;K00626;K01641	K00656	NA	NA	K00384;K17050	NA	NA	NA	NA	NA	NA	NA	K00194;K00194;K03518	K18023	NA	NA	NA	NA	NA	NA	NA	NA	K01692	NA	NA	K01895;K01895;K08264;K14128;K01895;K01895	K14127;K14128;K14127;K03389	K14127;K14128;K14127;K03389	K14084;K08264;K14128
JdF_10	maxbin_194_sub	K00927	K00171;K00169;K00169;K00170;K00244;K00172	NA	NA	NA	NA	NA	NA	NA	NA	K07537;K07539	NA	NA	NA	K00244	K00171;K00169;K00169;K00170;K01715;K01715;K13767;K00172;K00248	K01715;K01715;K00626	K01715;K01715;K00626	NA	K01641;K00626;K01641	NA	NA	NA	NA	NA	NA	NA	NA	NA	NA	NA	NA	NA	NA	NA	NA	NA	NA	NA	NA	NA	K13767;K00249	NA	NA	K03388;K14126;K14128;K03388;K03388;K03388;K03388	K03388;K14126;K14128;K03388;K03388;K03388;K03388	K03388;K14126;K14128;K03388;K03388;K03388;K03388	K03388;K14126;K14128;K03388;K03388;K03388;K03388
JdF_11	metabat_143	K00927	K00170;K00169;K00171;K00172;K01007;K01960;K01677;K00239;K01678	K05299	NA	NA	NA	NA	K00632;K00632	NA	NA	NA	NA	K13953	K22224;K22224;K01895;K01895	K01571;K00024;K00239	K00170;K00169;K00171;K00172;K00248;K17489;K01895;K01895	K00626;K00626;K00626;K07516;K00626;K00626;K00626;K00626	K00626;K00626;K00626;K07516;K00626;K00626;K00626;K00626	NA	K00626;K00626;K00626;K00626;K00626;K00626;K00626	K00656	NA	NA	K00384	NA	NA	NA	NA	NA	NA	NA	K14138;K00194;K00197	NA	NA	NA	NA	NA	NA	NA	NA	NA	K07516;K00249	NA	NA	K03388;K14126;K14128;K14127;K14128;K03388;K01895;K01895	K03388;K14126;K14128;K14127;K14128;K03388	K03388;K14126;K14128;K14127;K14128;K03388	K03388;K14126;K14128;K14127;K14128;K03388
JdF_12	concoct_123	K00134;K02446;K00927;K00134	K00239;K01679;K01679;K00239;K01958;K01958	NA	K13788;K13788;K00925	NA	NA	NA	K00632;K00632	NA	NA	NA	NA	K13953	K00128;K00163;K00163;K00158;K13788;K13788;K00925;K00162;K00161;K00161;K00162;K00627	K00239;K00239;K01958;K01958	K01895;K01895;K01782;K01895;K11263;K01895;K01782;K01895;K11263;K01895;K01692	K00626;K00626;K00626;K01692;K00074;K00626	K00626;K00626;K00626;K01692;K00074;K00626	NA	K00626;K00626;K00626;K01028;K01029;K00626	NA	NA	NA	K00384;K00384	NA	NA	NA	NA	K01061	NA	K01061	NA	NA	NA	NA	NA	NA	NA	NA	NA	NA	K01692	NA	NA	K01895;K01895;K01895;K01895;K01895;K01895	NA	NA	NA
JdF_13	concoct_140	K01808;K02446;K01624;K01624;K00134	K01595;K01679;K00240;K01007;K00240;K00239;K01681	NA	K13788;K00925	K14393	K00141	NA	K07104;K01821;K00632;K03464;K03381;K03381;K00632;K14727;K14727	NA	K03464;K03381;K03381;K14727;K14727	NA	NA	K13953;K13979;K13979;K13953	K00163;K00128;K00128;K00161;K00162;K00627;K00162;K00161;K00627;K00467;K00163;K13788;K00627;K00163	K00024;K00240;K01958;K00240;K00239	K01895;K01715;K01715;K01692;K01692;K01961	K00626;K00074;K01692;K01692;K00626	K00626;K00074;K01692;K01692;K00626	NA	K00626;K01029;K00626	NA	NA	K03741;K03741	K00384;K00384;K00384	NA	NA	NA	NA	K01061;K00217;K01061	K00217	K01061;K05783;K05784;K05550;K05549;K03381;K03381;K01061	NA	NA	K22336	K05349;K05349;K05349	K01183	NA	NA	NA	NA	NA	K01692;K01692	NA	NA	K01895	NA	NA	NA
JdF_14	concoct_172_sub	K02446;K01808;K02446;K00927;K00134	K00239;K00240;K01681;K01679;K00239;K01595	NA	NA	NA	NA	NA	K00632;K01055;K00632;K00632;K00632;K00632	NA	K01055	NA	NA	K13979;K00001;K00001;K00001	K00128;K00128	K00239;K00240;K00116;K00239	K01692;K01692;K00248;K01692;K01692;K01962;K01963;K11263;K01782;K00248;K00248;K01692;K01692;K01692;K00248;K11263;K01692;K01692	K01692;K01692;K00626;K01692;K00626;K01692;K00626;K00626;K00626;K00074;K00626;K01692;K01692;K00626;K00626;K00626;K00626;K01692;K01692;K01692	K01692;K01692;K00626;K01692;K00626;K01692;K00626;K00626;K00626;K00074;K00626;K01692;K01692;K00626;K00626;K00626;K00626;K01692;K01692;K01692	NA	K00626;K00626;K00626;K00626;K00626;K00626;K00626;K00626;K00626;K00626	NA	NA	K03741;K00537	K00384	NA	NA	NA	NA	K01061	NA	K01061	NA	NA	NA	K01179;K01179;K01179	K01183	NA	NA	NA	NA	NA	K01692;K01692;K01692;K01692;K00249;K00249;K00249;K00249;K00249;K00249;K01692;K01692;K00249;K00249;K00249;K01692;K01692;K01692	NA	NA	NA	NA	NA	NA
JdF_15	concoct_170_sub	K02446;K01808;K01808	K00244;K01676;K01595;K01681	NA	NA	NA	K00141;K00055	NA	K00632;K00632;K03464;K01856;K00632;K00632;K00632;K00632;K00632;K00632;K00632;K00632;K00632;K01055;K10216;K00632;K00632;K01666;K00632;K01055;K00632;K00632;K00632;K01856;K03381	NA	K03464;K01856;K01055;K01055;K01856;K03381	NA	K00148;K00148	K13953;K13979;K13953;K13979	K00467;K00161;K00162;K00627;K04073;K00161;K00162;K00627	K00244;K00116;K01958;K00116	K01692;K01692;K01962;K01963;K01692;K01692;K01692;K01692;K01692;K01782;K00248;K01692;K11263;K00248;K01692;K01692;K01692;K01895;K01692;K01895;K01692;K01782;K01692;K01692;K00248;K01895;K00248;K01962;K01963;K01692;K00232;K00248;K01692;K01692	K00626;K00626;K01692;K00074;K01692;K00626;K00626;K01692;K01692;K00626;K01692;K00626;K01692;K00626;K00626;K01692;K00626;K00074;K00626;K01692;K00626;K01692;K01692;K01692;K00626;K00626;K01692;K00626;K00626;K01692;K00626;K01692;K00626;K01692;K00626;K00626;K01692;K00626;K00626;K00626;K01692;K00626;K01692	K00626;K00626;K00626;K00626;K00626;K00626;K00626;K00626;K01782;K00626;K00626;K00626;K00626;K00626;K00626;K00626;K00626;K01782;K00626;K00626;K04073;K00626;K00626;K00626;K00626;K00626	NA	K00626;K00626;K01640;K00626;K00626;K00626;K00626;K00626;K00626;K00626;K00626;K00626;K01028;K01029;K01640;K00626;K01029;K01028;K00626;K00626;K00626;K00626;K00626;K01029;K01028;K01029;K00626;K00626;K00626;K00626;K00626;K00626	NA	NA	K03741;K03741;K03741;K03741	K00384;K00384;K00957;K00955;K00956;K00384;K00957;K00384;K00955;K00956;K00957	NA	NA	NA	NA	K00217	K01721;K00217	K01856;K05549;K01856;K03381;K05549;K05550;K05784;K05783	K03520;K03518;K03519	NA	NA	K05349	NA	NA	K01192	NA	NA	NA	K01692;K01692;K01692;K01692;K01692;K01692;K01692;K01692;K01692;K01692;K01692;K01692;K01692;K01692;K01692;K01692;K00232;K01692;K01692	NA	NA	K01895;K01895;K01895	NA	NA	NA
JdF_16	concoct_53	K01808;K01623	K01679;K01006;K03737;K01958	NA	NA	NA	NA	NA	NA	NA	NA	NA	NA	K13953	K00016;K18118;K00161;K00162;K00016;K00627;K00162	K00024;K01958	K11263;K03737;K03416;K17489;K17489;K17490;K01692	K01692	K01692	K00016;K00016	NA	NA	NA	NA	K00384;K00384;K00384	NA	NA	NA	NA	NA	NA	NA	NA	K18006	NA	NA	NA	K01190	NA	NA	K12373;K12373	K01190	K01692	NA	NA	NA	NA	NA	NA
JdF_17	concoct_41_sub	K00927	K01679;K00239;K00170;K00239;K00240	NA	NA	NA	NA	NA	NA	NA	NA	NA	NA	K13953	K00163;K00627;K00163;K00128;K00128	K00239;K00024;K00239;K00240	K01715;K01895;K00170;K01962;K01963;K01961;K11263	K01715	K01715	NA	K01574;K01027;K01035	NA	NA	NA	K00384;K00384	NA	NA	NA	NA	NA	NA	NA	K03519;K03520;K03518	NA	K03594	NA	NA	NA	NA	NA	NA	NA	K00249	K08097	NA	K01895	NA	NA	NA
JdF_18	concoct_150	K01624	K01960;K01006;K15234	K05299;K05299;K05299;K00198	NA	NA	NA	NA	NA	NA	NA	NA	NA	NA	K01512	K01571	K01963;K01961;K00248;K01715	K00626;K01715;K00626	K00626;K01715;K00626	NA	K00626;K00626	NA	NA	NA	K00957	NA	NA	NA	NA	NA	NA	NA	K00194;K00197	NA	NA	NA	NA	NA	NA	NA	NA	NA	NA	NA	NA	K03389;K03388;K03388	K03389;K03388;K03388	K03389;K03388;K03388	K03389;K03388;K03388
JdF_19	concoct_3	K01624	K01006;K15232;K01678;K01677;K15234	K00198;K00198	NA	NA	NA	NA	NA	NA	NA	NA	NA	K13954	K01512;K00627;K00162;K00161	K00027	K01963;K01715;K00248;K00248;K01962;K01962;K01963	K00626;K01715;K00626	K00626;K01715;K00626	NA	K00626;K00626	NA	NA	K03741	K00958;K00384	NA	NA	NA	NA	NA	NA	NA	K14138;K00194;K00194;K00197	K00436	NA	K05350	NA	NA	NA	NA	NA	NA	NA	NA	NA	K03389;K03390;K03388;K03388;K03389;K03390;K03389;K03388;K03388;K03390;K03389	K03389;K03390;K03388;K03388;K03389;K03390;K03389;K03388;K03388;K03390;K03389	K03389;K03390;K03388;K03388;K03389;K03390;K03389;K03388;K03388;K03390;K03389	K03389;K03390;K03388;K03388;K03389;K03390;K03389;K03388;K03388;K03390;K03389
JdF_20	metabat_61	K01808;K01624	K15230;K01006;K01681	NA	NA	NA	NA	NA	NA	NA	NA	NA	NA	NA	K01512;K01895;K01895	NA	K01895;K01963;K01962;K01905;K01895	K00023	K00023	NA	NA	NA	NA	NA	K12527;K12528;K00384	NA	NA	NA	NA	NA	NA	NA	K03518;K03519;K03518;K03518;K03518	NA	NA	NA	NA	NA	NA	NA	NA	NA	NA	NA	NA	K01895;K01895	K00205	NA	NA
JdF_21	maxbin_198_sub	K00150;K00927;K00927;K01624	K01007;K01007;K01678;K01677	NA	K13788	NA	NA	NA	NA	NA	NA	NA	NA	NA	K13788	NA	NA	K00929;K00634;K00929	NA	NA	NA	NA	NA	NA	K00957;K00957	NA	NA	NA	NA	NA	NA	NA	K03518	NA	NA	NA	NA	K01190	NA	NA	NA	K01190	NA	NA	NA	K03388	K03388	K03388	K03388
JdF_22	maxbin_263_sub	K01624;K00134;K01808	K01677;K01007;K01678	NA	K15024	NA	NA	NA	K01821	NA	NA	NA	NA	NA	K22224;K00162;K00627;K15024;K00161	K00027	K00656;K01963;K01961;K00656;K00656	K00929	NA	NA	NA	K00656;K00656;K00656	NA	NA	NA	NA	NA	NA	NA	NA	NA	NA	K03519;K00197;K03518;K03518;K03519	K18023	NA	NA	NA	K01190	NA	NA	NA	K01190	NA	NA	NA	K03388	K03388	K03388	K03388
JdF_23	metabat_38	K01624;K01808;K00134;K00927	NA	NA	NA	NA	NA	NA	NA	NA	NA	NA	NA	NA	NA	K00027	NA	NA	NA	NA	NA	NA	NA	NA	NA	NA	NA	NA	NA	NA	NA	NA	NA	NA	NA	K01179	NA	NA	NA	NA	NA	NA	NA	NA	NA	NA	NA	NA	NA
JdF_24	concoct_164_sub	K00927;K00927	NA	NA	NA	NA	NA	NA	NA	NA	NA	NA	NA	K00001	K00627;K01512;K01512	NA	K00656;K00656	K00626	K00626	NA	K00626	K00656;K00656	NA	NA	NA	NA	NA	NA	NA	NA	NA	NA	NA	NA	K03594	K19668	NA	NA	NA	NA	NA	NA	NA	NA	NA	K03388	K03388	K03388	K03388
JdF_25	concoct_138	K01624;K00927;K00134;K03841;K01808	K01681;K00239;K00240;K01595;K01679;K01007;K01595;K01679	NA	NA	NA	NA	NA	NA	NA	NA	NA	NA	K13979	K00162;K00128;K00128;K00161;K00627	K00239;K00240;K00024	K01963;K01715;K01962	K00626;K00626;K01715	K00626;K00626;K01715	NA	K00626;K01640;K00626	NA	NA	K03741;K03741	K00384;K00384	NA	NA	NA	NA	NA	NA	K05784	NA	NA	NA	K01179;K01179;K05349;K05349;K01179;K05349	K01183	K01190;K01190	NA	K01198	K12373	K01190;K01190	NA	K08097;K05979	NA	NA	NA	NA	NA
JdF_26	maxbin_265_sub	K00134	K00172;K01678;K00170;K00172;K01006;K01006;K00169;K00170;K00239	NA	NA	NA	NA	NA	K00632;K01821	NA	NA	K19515;K19515;K19515	NA	K00002	K00162;K00016;K01895	K00024;K00239	K00172;K00189;K01692;K00248;K00170;K00172;K17489;K00169;K00170;K01895	K01692;K00626;K00626	K01692;K00626;K00626	K00016	K00626;K00626;K01641;K01641	K00656;K00656	K08356	NA	K00955;K00956	NA	NA	NA	NA	NA	NA	NA	K00194;K00197	NA	NA	K05349	K01183	NA	K18785;K18785	NA	NA	NA	K01692	NA	NA	K03388;K03388;K14127;K14127;K01895	K03388;K03388;K14127;K14127	K03388;K03388;K14127;K14127	K03388;K03388;K14127;K14127
JdF_27	maxbin_207_sub	K01624	K00169;K01681	NA	NA	NA	NA	NA	K16246	NA	NA	NA	NA	K12957;K13953	NA	NA	K01961;K00169;K01961;K00248	NA	NA	NA	K01641	NA	NA	NA	NA	NA	NA	NA	NA	NA	NA	NA	K03518	NA	NA	K01179;K01179	NA	NA	NA	NA	K01137;K01132	NA	K00249	NA	K16161	K03388;K03389;K03388	K03388;K03389;K03388	K03388;K03389;K03388	K03388;K03389;K03388
JdF_28	maxbin_266_sub	K00134;K00927;K00927;K00134	K01007;K00244;K00170	K05299	NA	NA	NA	NA	NA	NA	NA	NA	NA	K00002;K13953;K13953	K00161;K01026;K00161;K00162;K00627;K00627;K01512	K00244;K00027	K00656;K01961;K11263	K00626;K00626	K00626;K00626	NA	K00626;K00626	K00656	NA	NA	K00958;K17052;K17051	NA	NA	NA	NA	NA	NA	NA	K00197	NA	NA	NA	NA	K01190;K01190	NA	NA	K01137;K12373	K01190;K01190	NA	NA	NA	K03388;K03390	K03388;K03390	K14080;K03388;K03390	K03388;K03390
JdF_29	maxbin_124_sub	K01808	K15231;K01007;K00171;K00172	NA	NA	NA	NA	NA	NA	NA	NA	K19516	NA	K00001	NA	NA	K00171;K00172	NA	NA	NA	K01641	K00656	NA	NA	K00958;K13811;K00958;K00958	NA	NA	NA	NA	K01061	NA	K01061	K03518	NA	NA	K05350	NA	NA	NA	NA	NA	NA	NA	NA	NA	K03388;K03390	K03388;K03390	K03388;K03390	K03388;K03390;K14084
JdF_30	metabat_79	K01808;K01808;K01624	K01678;K01677	K00198	K00925;K00625	NA	NA	NA	NA	NA	NA	NA	NA	K13953	K00627;K00625;K00161;K22224	K01571	K01961;K00248;K01905;K22224	NA	NA	NA	NA	NA	NA	NA	NA	NA	NA	NA	NA	NA	NA	NA	K14138	NA	K03594	K05350	NA	K12308	NA	NA	NA	K12308	NA	NA	NA	K14126;K14128;K00925;K00625;K14126;K14126;K14128;K14126	K14126;K14128;K14126;K14126;K14128;K14126	K14126;K14128;K14126;K14126;K14128;K14126	K14126;K14128;K14126;K14126;K14128;K14126
JdF_31	maxbin_95_sub	K01623;K00855	K03737;K01007;K01682;K01007;K01682	NA	K00925	K14393	NA	NA	K03464;K01055	NA	K03464;K01055	K07539;K04114;K04115	NA	NA	K00925;K00128	NA	K01963;K03737	K00209;K00626	K00209;K00626	NA	K00626	NA	NA	NA	K17050;K00958	NA	NA	NA	NA	NA	NA	NA	K00197	NA	NA	K01179;K05349	NA	NA	NA	NA	NA	NA	K00249	NA	NA	K00925;K14127	K14127	K14127	K14127
JdF_32	maxbin_53_sub	K00927;K01807;K01623;K00134	NA	NA	NA	NA	NA	NA	NA	NA	NA	NA	NA	K13953;K13953	K00163;K00138	K00029	NA	NA	NA	NA	NA	NA	NA	NA	K00384	NA	NA	NA	NA	NA	NA	NA	NA	NA	NA	NA	NA	NA	NA	NA	NA	NA	K06445	NA	NA	NA	NA	NA	NA
JdF_33	concoct_35_sub	K01807	K00239;K01007;K01681;K01007;K01681;K01681	NA	NA	NA	K00141	NA	K01055;K01821;K18364	NA	K01055	NA	NA	K00121	K01895;K01895;K01512	K00239;K00024	K01895;K01895	K00023;K00626	K00023;K00626	K03777;K03777;K03777	K00626	NA	NA	K03741	NA	NA	NA	NA	NA	K01061	NA	K01061	K03518;K03520;K03519	NA	NA	NA	NA	NA	NA	NA	NA	NA	K00249	NA	NA	K01895;K01895	NA	NA	NA
JdF_34	metabat_112	K00134;K00927;K00134;K01623	K00240;K00239;K01681;K01007;K01679;K01595;K01007	NA	NA	K14393;K14393	K00055	NA	K02554;K00632;K01055;K00446	NA	K01055	NA	NA	K13953;K13953	K00162;K00627;K00162;K00161;K00161;K00161;K00162;K00627;K00163;K00128;K00163;K01512;K00627;K00016	K00244;K00240;K00239;K00024;K01003;K00244;K00244	K01782;K01825;K01692;K01692;K01692;K01895;K01895;K01026;K00248;K01692;K01895;K01961;K01026;K01692;K01895;K01895;K01962;K01692;K01692;K01692;K00248	K00626;K01782;K00626;K00626;K00626;K00626	K00626;K01782;K00626;K00626;K00626;K00626	K00016	K00626;K00626;K00626;K00626;K00626	NA	NA	K03741;K00537;K00537	K00384;K00958;K00955;K00384	NA	NA	NA	K21607	K01061;K00217;K01061;K01061;K01061	K00217;K01721	K01061;K01061;K01061;K01061	K03519;K03518;K03519;K03518;K03519;K03518;K03518;K03518;K03519;K03520;K03518;K03519	NA	NA	NA	NA	NA	NA	NA	NA	NA	K00249;K00249;K00249;K00249;K01692;K01692;K01692;K00249;K00249;K00249;K00249;K00249;K01692;K07516;K01692;K00249;K01692;K00249;K00249;K00249;K01692;K01692;K00249;K00249	NA	NA	K01895;K01895;K01895;K01895;K01895	NA	NA	NA
JdF_35	metabat_30_sub	K01807	K01007;K01679;K01007	NA	NA	NA	NA	NA	K00632	NA	NA	NA	NA	K00001	K01895	NA	K01692;K01961;K01692;K01895;K01782;K01825	K00074;K01692;K01692;K00626;K00626	K00074;K01692;K01692;K00626;K00626	K03778	K00626;K00626	NA	NA	K00537;K00537;K03741;K03741	K00384;K00955;K00956;K00957;K00384	NA	NA	NA	NA	NA	NA	NA	NA	NA	NA	NA	NA	NA	NA	NA	NA	NA	K01692;K06445;K01692;K06445	NA	NA	K01895	NA	NA	NA
JdF_36	concoct_154	K00134;K00927;K01623;K01807;K00134	K01679;K01681;K01006;K01679;K00244	NA	K00625;K00925	NA	NA	NA	K01055;K01055;K07104;K03381;K00632;K01821	K04102	K01055;K01055;K03381	NA	NA	K00114;K13953	K00163;K00128;K00128;K00162;K00627;K01067;K00128;K00625	K00024;K00244	K01895;K01692;K01026;K00248;K01961;K01895;K01692;K00625;K01782;K01895	K00626;K01692;K00626;K00626;K00074;K01692;K00634	K00626;K01692;K00626;K00626;K00074;K01692	NA	K00626;K01574;K00626;K00626;K01574	NA	NA	K00537	K00384;K00384;K00384;K00955;K00956;K00957	NA	NA	NA	K15241	K01061;K01061	K01721;K01721	K01061;K03381;K01061	K03518;K03519;K03520;K03520;K03519;K03518;K03520;K03520;K03519;K03520;K03518;K03518;K03519;K03520;K03520;K03519	NA	K03594	NA	NA	NA	NA	NA	NA	NA	K01692;K00249;K01692;K07516;K00249	K05884	NA	K00625;K00925	NA	NA	NA
JdF_37	maxbin_42_sub	K00134	K01007	NA	K00925;K00625	NA	NA	NA	K02554;K14727	NA	K14727	K07539	K00148	K13953	K00627;K00162;K00161;K00625	NA	K01782;K01908;K01692;K01692;K01692;K00625;K19745;K01963	K01782;K00626;K00626;K00626	K01782;K00626;K00626;K00626	NA	K00626;K00626;K00626;K01574	NA	NA	K00537;K03741	K00955;K00957	NA	NA	NA	NA	NA	NA	NA	K03520	NA	NA	K05350	NA	NA	NA	NA	NA	NA	K00249;K00249;K01692;K00249;K00249;K00249;K07516;K01692;K01692	NA	NA	K00925;K00625	NA	NA	NA
JdF_38	metabat_8	K00134;K00927;K01808	K01681;K01676;K01007;K00240;K00239	NA	NA	NA	NA	NA	K02554;K07104	NA	NA	NA	NA	K13953;K13953	K01895;K00161;K01895;K00163;K01895;K01895;K00161;K00161;K00162;K00627;K00162;K01895;K01512;K00627	K00240;K00239;K00024	K01895;K01895;K19745;K01692;K01782;K01692;K01715;K01692;K01895;K00248;K01692;K01895;K01895;K01692	K00626;K01692;K00626;K01692;K01692;K01692;K00626;K00626;K00074;K01692	K00626;K01692;K00626;K01692;K01692;K01692;K00626;K00626;K00074;K01692	NA	K01640;K00626;K00626;K00626;K01640;K00626;K01029;K01035;K01574	NA	NA	K00537	K00955;K00957;K00955;K00957;K00384;K00384	NA	NA	NA	K15241	K01061;K01061;K00217;K01061;K01061;K01061;K01061	K01721;K00217	K01061;K01061;K01061;K01061;K01061;K01061	K03519;K03520;K03518;K03520;K03520	NA	K03594	K05350	K01183	NA	NA	NA	NA	NA	K00249;K00249;K01692;K00249;K01692;K00249;K01692;K00249;K01692;K01692	NA	NA	K01895;K01895;K01895;K01895;K01895	NA	NA	NA
JdF_39	metabat_113	K01807;K00134	K00172;K00170;K01007;K00239;K01007;K01007;K01007;K00169;K00171;K00172;K01681;K00172;K01007;K00170;K00169;K01679	K00198	NA	NA	NA	NA	NA	NA	NA	NA	NA	K13953	K01512;K01512;K01895	K00239;K00244	K00172;K00170;K01782;K01895;K00169;K00171;K00172;K00172;K00170;K00169	K00626;K01782;K00626;K00626;K00626	K00626;K01782;K00626;K00626;K00626	NA	K00626;K00626;K01641;K00626;K00626	NA	NA	NA	K00384;K00958;K07309;K07310;K00384	NA	NA	NA	NA	NA	NA	NA	K00194;K03520	NA	K03594	NA	NA	NA	NA	NA	NA	NA	NA	NA	NA	K03388;K14127;K03388;K03388;K01895;K03388;K03389;K03389	K03388;K14127;K03388;K03388;K03388;K03389;K03389	K03388;K14127;K03388;K03388;K03388;K14080;K03389;K14080;K03389	K03388;K14127;K03388;K03388;K03388;K03389;K16179;K03389
JdF_40	metabat_36	K00927;K00134;K01624	K01006;K00170;K00169;K00171;K00172;K00172;K01682;K00240;K01682;K01678;K00170;K00169;K01677;K00239;K00239;K01006	NA	NA	NA	NA	NA	K01821	NA	NA	K07539	NA	K13954	K22224;K00627;K00158;K22224;K22224	K01571;K00240;K00024;K00239;K00239	K01961;K00170;K00169;K00171;K00172;K00172;K01962;K01963;K01961;K01961;K00170;K00169;K01963	K00626;K00023;K00626;K00626	K00626;K00023;K00626;K00626	NA	K00626;K01641;K00626;K01641;K00626	NA	NA	NA	K00958;K00958	NA	NA	NA	NA	NA	NA	K05784	K14138	NA	NA	NA	NA	NA	NA	NA	NA	NA	K00249;K00249	K08097	NA	K03389;K03389;K03390	K03389;K03389;K03390	K03389;K03389;K03390	K03389;K03389;K03390
JdF_41	metabat_123	K01808	K01677;K01682;K01678;K03737;K15234;K01682;K01678	K00198;K05299	NA	NA	K00141;K15760	NA	K01821;K01666;K16242;K01821	NA	NA	K07537	NA	K13953;K13953	K00627;K22224;K22224;K01512	K00024;K01571;K00024	K01715;K00248;K15016;K01961;K01905;K22224;K01963;K01961;K22224;K01715	K15016;K00626;K00626;K00626;K00626;K00626;K00626	K15016;K00626;K00626;K00626;K00626;K00626;K00626	NA	K00626;K00626;K00626;K01641;K00626;K00626;K00626	K00656;K00656;K00656	NA	K03741	K00958;K00384	NA	K22353;K22357	NA	NA	NA	NA	NA	K00197;K03518;K03519;K03519;K00197;K00194;K14138;K03518;K03518;K03518	NA	K03594	K01179	K01183	NA	K18785	NA	K12373	NA	K00249;K00249	K08097;K08097	K16157	K14128	K14128	K14128	K14128;K14084
JdF_42	metabat_137	K01624;K01807;K00927;K00134	K00239;K01678;K01677;K00172;K00171;K00169;K00170	NA	NA	NA	NA	NA	K00632	NA	NA	K07538	NA	NA	K01895;K01512;K00627;K22224;K01895	K00239;K00027	K01961;K01895;K15016;K01715;K00172;K00171;K00169;K00170;K00248;K01895	K00626;K00626;K15016;K00626	K00626;K00626;K15016;K00626	NA	K00626;K01641;K00626;K00626	NA	NA	K03741	K00384;K00384	NA	NA	NA	NA	NA	NA	NA	NA	NA	NA	NA	NA	NA	NA	NA	NA	NA	K00249	K05979	NA	K03388;K03388;K01895;K03388;K03389;K03388;K03388;K03389;K03390;K14126;K14128;K03389;K03390;K03388;K03388;K03388;K14128;K14126;K03388;K03390;K03389;K03390;K03389;K03388;K03389;K03390;K03388;K01895	K00202;K00200;K00201;K00203;K03388;K03388;K03388;K00319;K03389;K14127;K03388;K03388;K03389;K03390;K14126;K14128;K03389;K03390;K14127;K03388;K03388;K03388;K14128;K14126;K03388;K03390;K03389;K03390;K03389;K03388;K03389;K03390;K03388	K03388;K03388;K03388;K03389;K14127;K03388;K03388;K03389;K03390;K14126;K14128;K03389;K03390;K14127;K03388;K03388;K03388;K14128;K14126;K03388;K03390;K03389;K03390;K03389;K03388;K03389;K03390;K03388	K03388;K03388;K03388;K03389;K14127;K03388;K03388;K03389;K03390;K14126;K14128;K03389;K03390;K14127;K03388;K03388;K03388;K14128;K14126;K03388;K03390;K03389;K03390;K03389;K03388;K03389;K03390;K03388
[truncated: 12 more columns]
